# Supplementary material for: Ontogenetic feeding shifts in two thresher shark species in the Galapagos Marine Reserve
Source: PeerJ. 2024 Dec 16;12:e18681. doi: 10.7717/peerj.18681 (PMC11657203; doi:10.7717/peerj.18681)
Supplement: Supplemental Information 1 [file peerj-12-18681-s001.xlsx]

## Sheet: Sheet1
	SAMPLE	SEX	SPECIE	MATURITY STAGE	d15N ‰ (Air-N2)	d13C ‰ (V-PDB)	C/N	%N OBTAINED	%C OBTAINED
	JUA5-012 N	M	A. pelagicus	N	9.58	-16.28	3.89	5.19	17.27
	JUA5-011 N	F	A. pelagicus	N	9.39	-19.71	4.89	5.32	22.13
	JUA5-009 N	M	A. pelagicus	N	6.84	-15.44	4.08	4.58	15.63
	JUA5-006 N	M	A. pelagicus	N	6.98	-14.51	3.75	5.44	17.46
	JUA5-004 N	M	A. pelagicus	N	7.71	-14.39	3.62	4.64	14.41
	JUA5-003 N	M	A. pelagicus	N	9.17	-14.38	3.3	5.2	14.75
	JUA5-002 N	M	A. pelagicus	N	9.66	-13.96	3.67	5.03	15.82
	JUA5-001 N	F	A. pelagicus	N	10.76	-14.35	3.53	5.2	15.76
	ANG4-028 N	M	A. pelagicus	N	8.54	-14.14	3.24	4.85	13.52
	ANG4-027 N	M	A. pelagicus	N	9.91	-13.96	3.28	5.86	16.51
	ANG4-025 N	M	A. pelagicus	N	10.02	-15.87	3.51	5.44	16.41
	ANG4-024 N	M	A. pelagicus	N	9.27	-14.6	3.82	6.55	21.46
	ANG4-022 N	M	A. pelagicus	N	9.31	-14.33	3.18	5.08	13.93
	ANG4-020 N	M	A. pelagicus	N	7.8	-16.91	3.7	5.18	16.44
	ANG4-019 N	M	A. pelagicus	N	8.57	-17.21	3.79	5.16	16.74
	ANG4-018 N	M	A. pelagicus	N	10.64	-14.77	3.36	5.28	15.27
	ANG4-017 N	M	A. pelagicus	N	10.73	-16.11	3.78	4.43	14.32
	ANG4-016 N	M	A. pelagicus	N	9.58	-16.34	3.68	6.24	19.72
	ANG4-015 N	M	A. pelagicus	N	10.46	-13.01	3.29	5.22	14.76
	ANG4-014 N	M	A. pelagicus	N	10.16	-14.45	3.58	4.54	13.94
	ANG4-006 N	M	A. pelagicus	N	9.35	-14.98	3.47	4.95	14.74
	ANG4-004 N	M	A. pelagicus	N	9.18	-15.08	3.64	5.04	15.7
	ANG4-002 N	M	A. pelagicus	N	10.04	-17.94	4.02	5.64	19.41
	ANG4-001 N	M	A. pelagicus	N	9.6	-15.57	3.85	5.39	17.75
	LAR5-043 J	F	A. pelagicus	J	10.39	-15.71	3.39	6.53	19.03
	JUA5-012 J	M	A. pelagicus	J	8.49	-14.79	3.41	5.65	16.54
	JUA5-011 J	F	A. pelagicus	J	11.75	-16.44	4.13	4.4	15.22
	JUA5-010 J	M	A. pelagicus	J	11.47	-15	3.55	5.67	17.3
	JUA5-009 J	M	A. pelagicus	J	11.56	-14.51	3.33	6.6	18.89
	JUA5-007 J	M	A. pelagicus	J	10.51	-14.87	3.36	6.34	18.33
	JUA5-006 J	M	A. pelagicus	J	7.1	-14.78	3.67	5.76	18.14
	JUA5-005 J	M	A. pelagicus	J	9.14	-15.03	3.36	6.04	17.42
	JUA5-004 J	M	A. pelagicus	J	8.87	-13.76	3.51	6.11	18.39
	JUA5-003 J	M	A. pelagicus	J	10.14	-14.4	3.32	5.99	17.11
	JUA5-002 J	M	A. pelagicus	J	9.29	-14.03	3.58	4.61	14.14
	JUA5-001 J	F	A. pelagicus	J	9.61	-13.79	3.56	4.97	15.18
	ANG4-028 J	M	A. pelagicus	J	9.88	-13.93	3.23	5.82	16.18
	ANG4-027 J	M	A. pelagicus	J	10.78	-14.9	3.24	7.21	20.09
	ANG4-025 J	M	A. pelagicus	J	9.77	-14.31	3.31	7.21	20.54
	ANG4-024 J	M	A. pelagicus	J	6.27	-14.62	3.51	4.93	14.85
	ANG4-023 J	M	A. pelagicus	J	7.98	-15.38	3.37	5.53	16.03
	ANG4-022 J	M	A. pelagicus	J	9.15	-15.17	3.17	8.37	22.85
	ANG4-021 J	M	A. pelagicus	J	7.39	-14.59	3.04	7.54	19.8
	ANG4-020 J	M	A. pelagicus	J	7.81	-15	3.21	5.37	14.87
	ANG4-019 J	M	A. pelagicus	J	9.05	-14.1	3.29	5.09	14.42
	ANG4-018 J	M	A. pelagicus	J	10.92	-14.7	3.32	5.36	15.29
	ANG4-017 J	M	A. pelagicus	J	9.98	-15.46	3.4	5.66	16.56
	ANG4-016 J	M	A. pelagicus	J	10.03	-15.19	3.22	5.64	15.65
	ANG4-015 J	M	A. pelagicus	J	10.34	-14.51	3.24	5.7	15.89
	ANG4-014 J	M	A. pelagicus	J	10.86	-14.7	3.43	5.5	16.21
	ANG4-013 J	M	A. pelagicus	J	11.72	-15.57	3.55	6.49	19.77
	ANG4-012 J	F	A. pelagicus	J	9.02	-17.77	4.12	5.88	20.72
	ANG4-011 J	F	A. pelagicus	J	9.23	-15.2	3.62	5.24	16.24
	ANG4-010 J	F	A. pelagicus	J	11.34	-18.19	4.23	5.71	20.63
	ANG4-006 J	M	A. pelagicus	J	8.34	-14.99	3.27	5.57	15.65
	ANG4-005 J	F	A. pelagicus	J	10.03	-15.7	3.5	5.42	16.29
	ANG4-004 J	M	A. pelagicus	J	8.48	-15.86	3.53	5.98	18.13
	ANG4-003 J	F	A. pelagicus	J	8.73	-15.17	3.59	5.86	18.08
	ANG4-002 J	M	A. pelagicus	J	11.39	-15.24	3.35	6.16	17.73
	ANG4-001 J	M	A. pelagicus	J	9.96	-15.35	3.24	6.58	18.37
	JUA5-012 A	M	A. pelagicus	A	8.8	-14.65	3.43	6.51	19.19
	JUA5-009 A	M	A. pelagicus	A	10.97	-14.52	3.32	9.1	26.02
	JUA5-004 A	M	A. pelagicus	A	9.77	-14.32	3.21	9.02	24.97
	JUA5-003 A	M	A. pelagicus	A	10.35	-14.19	3.26	7.87	22.09
	JUA5-002 A	M	A. pelagicus	A	9.97	-13.56	3.54	5.04	15.3
	JUA5-001 A	F	A. pelagicus	A	10.58	-13.7	3.53	5.34	16.18
	ANG4-028 A	M	A. pelagicus	A	10.03	-14.42	3.13	9.92	26.74
	ANG4-027 A	M	A. pelagicus	A	9.73	-14.19	3.15	6.57	17.83
	ANG4-025 A	M	A. pelagicus	A	10.69	-14.62	3.18	9.17	25.1
	ANG4-024 A	M	A. pelagicus	A	8.37	-14.26	3.62	5.27	16.39
	ANG4-023 A	M	A. pelagicus	A	10.9	-14.21	3.19	9.02	24.79
	ANG4-022 A	M	A. pelagicus	A	8.62	-14.57	2.99	9.57	24.68
	ANG4-021 A	M	A. pelagicus	A	7.56	-14.44	2.98	9.34	24.03
	ANG4-020 A	M	A. pelagicus	A	7.44	-14.97	3.03	9.73	25.45
	ANG4-019 A	M	A. pelagicus	A	10.76	-13.36	2.95	7.84	20
	ANG4-018 A	M	A. pelagicus	A	10.72	-15.85	3.34	6.28	18.07
	ANG4-016 A	M	A. pelagicus	A	8.19	-15.62	3.34	7.28	20.9
	ANG4-015 A	M	A. pelagicus	A	10.12	-14.45	3.19	9.79	26.91
	ANG4-006 A	M	A. pelagicus	A	9.06	-14	3.13	8.23	22.22
	ANG4-004 A	M	A. pelagicus	A	9.92	-13.74	3.22	8.3	22.98
	ANG4-002 A	M	A. pelagicus	A	10.9	-14.38	3.37	6.75	19.54
	ANG4-001 A	M	A. pelagicus	A	10.43	-13.89	3.21	7.83	21.64
	LAR5-46 N	M	A. superciliosus	N	8.28	-15.28	3.56	4.08	12.46
	LAR5-39 N	M	A. superciliosus	N	7.91	-16.9	3.66	6.11	19.16
	LAR5-36 N	F	A. superciliosus	N	9.39	-13.91	3.67	5.17	16.24
	LAR5-34 N	M	A. superciliosus	N	9.82	-13.96	3.76	6.33	20.35
	LAR5-33 N	M	A. superciliosus	N	7.46	-14.18	3.65	4.55	14.24
	LAR5-31 N	M	A. superciliosus	N	7.96	-14.78	3.97	6.03	19.95
	LAR5-22 N	M	A. superciliosus	N	7.87	-14.21	3.72	4.88	15.53
	LAR5-17 N	F	A. superciliosus	N	8.91	-14.04	3.65	5.99	18.77
	LAR5-16 N	M	A. superciliosus	N	8.46	-14.65	3.62	4.51	13.99
	JUA5-16 N	M	A. superciliosus	N	9.45	-14.27	3.73	6.05	19.33
	JUA5-15 N	M	A. superciliosus	N	8.54	-13.5	3.62	5.57	17.28
	JUA5-14 N	M	A. superciliosus	N	10.09	-13.38	3.63	5.05	15.73
	JUA5-013 N	M	A. superciliosus	N	8.39	-19.58	4.55	6.85	26.64
	JUA5-008 N	F	A. superciliosus	N	10.01	-13.99	3.65	5.8	18.15
	ANG4-65 N	M	A. superciliosus	N	8.04	-13.25	3.6	5.26	16.23
	ANG4-59 N	M	A. superciliosus	N	7.76	-13.96	3.51	5.29	15.96
	ANG4-56 N	M	A. superciliosus	N	7.8	-15.69	4.16	5.27	18.28
	ANG4-55 N	M	A. superciliosus	N	8.6	-15.21	3.3	7.71	21.91
	ANG4-07 N	M	A. superciliosus	N	8.03	-17.87	3.92	6.53	21.89
	LAR5-46 J	M	A. superciliosus	J	6.81	-15.68	3.31	5.7	16.25
	LAR5-39 J	M	A. superciliosus	J	6.48	-15.19	3.96	4.65	15.37
	LAR5-36 J	F	A. superciliosus	J	7.53	-14.09	3.53	5.29	16.01
	LAR5-34 J	M	A. superciliosus	J	6.82	-14.97	3.63	6.4	19.96
	LAR5-33 J	M	A. superciliosus	J	7.74	-14.14	3.64	5.71	17.84
	LAR5-31 J	M	A. superciliosus	J	7.31	-14.84	3.54	4.08	12.38
	LAR5-22 J	M	A. superciliosus	J	8.33	-15.73	3.76	4.55	14.68
	LAR5-17 J	F	A. superciliosus	J	6.09	-14.36	3.54	5.01	15.25
	LAR5-16 J	M	A. superciliosus	J	7.44	-14.19	3.34	5.22	14.97
	LAR4-03 J	M	A. superciliosus	J	8.98	-14.25	3.29	6.18	17.47
	JUA5-16 J	M	A. superciliosus	J	6.89	-14.59	3.56	5.9	18.02
	JUA5-15 J	M	A. superciliosus	J	5.62	-14.47	3.55	5.09	15.52
	JUA5-14 J	M	A. superciliosus	J	10.37	-13.49	3.4	5.53	16.12
	JUA5-013 J	M	A. superciliosus	J	10.93	-14.94	3.33	7.32	20.97
	JUA5-008 J	F	A. superciliosus	J	7.97	-14.09	3.5	5.41	16.23
	ANG4-65 J	M	A. superciliosus	J	9.33	-13.81	3.46	5.64	16.76
	ANG4-59 J	M	A. superciliosus	J	8.26	-14.74	3.59	5.07	15.63
	ANG4-57 J	F	A. superciliosus	J	5.73	-15.4	3.56	5.91	18.04
	ANG4-56 J	M	A. superciliosus	J	9.9	-13.95	3.09	10.14	27.01
	ANG4-55 J	M	A. superciliosus	J	8.37	-14.44	3.3	7.37	20.94
	ANG4-07 J	M	A. superciliosus	J	6.9	-16.79	3.63	5.46	16.99
	LAR5-46 A	M	A. superciliosus	A	7.5	-15.13	3.3	7.24	20.54
	LAR5-36 A	F	A. superciliosus	A	6.65	-14.76	3.63	5.3	16.5
	LAR5-33 A	M	A. superciliosus	A	7.2	-14.65	3.51	5.49	16.58
	LAR5-31 A	M	A. superciliosus	A	6.36	-14.18	3.52	5.48	16.58
	LAR5-17 A	F	A. superciliosus	A	6.18	-14.79	3.64	4.28	13.36
	LAR5-16 A	M	A. superciliosus	A	8.58	-13.61	3.45	5.34	15.85
	JUA5-16 A	M	A. superciliosus	A	5.42	-15.43	3.86	3.94	12.71
	JUA5-14 A	M	A. superciliosus	A	10.87	-13.76	3.51	5.26	15.84
	JUA5-008 A	F	A. superciliosus	A	7.73	-14.44	3.49	4.84	14.49
	ANG4-65 A	M	A. superciliosus	A	8.45	-13.3	3.49	5.27	15.78
	ANG4-59 A	M	A. superciliosus	A	8.13	-13.17	3.59	4.88	15.01
	ANG4-56 A	M	A. superciliosus	A	9.86	-14.57	3.1	6.17	16.49
	ANG4-07 A	M	A. superciliosus	A	7.57	-15.52	3.56	6.08	18.6

## Sheet: Sheet2
		94	Alopias pelagicus samples			11	Females
		36	neonates			83	Males
		36	juveniles
		22	Adults
		55	Alopias superciliosus samples			10	Females
		21	neonates			45	Males
		21	juveniles
		13	Adults
